# Supplementary material for: Providing Students with Adequate School Drinking Water Access in an Era of Aging Infrastructure: A Mixed Methods Investigation
Source: MDPI journal article supplement (doi:10.3390/ijerph17010062), 2019-12-20
Supplement: s1 [file s1]

**Instructions.** Read each question below. Circle the response below each question that best matches your own answer. There are no right or wrong answers to these questions – we want to know what YOU think.

**1. During lunch, how often do you usually drink water? Circle one.**

|           |                 |                 |                     |                      |       |
|-----------|-----------------|-----------------|---------------------|----------------------|-------|
| Every day | 3-4 days a week | 1-2 days a week | A few times a month | Once a month or less | Never |
|-----------|-----------------|-----------------|---------------------|----------------------|-------|

**2. During lunch, how much water do you usually drink?**

|                |                       |                              |                               |            |                                  |
|----------------|-----------------------|------------------------------|-------------------------------|------------|----------------------------------|
| A whole bottle | About a half a bottle | A whole plastic or paper cup | A half a plastic or paper cup | A few sips | I don't drink water during lunch |
|----------------|-----------------------|------------------------------|-------------------------------|------------|----------------------------------|

**3. During recess, gym, or PE, how often do you usually drink water? Circle one.**

|           |                 |                 |                     |                      |       |
|-----------|-----------------|-----------------|---------------------|----------------------|-------|
| Every day | 3-4 days a week | 1-2 days a week | A few times a month | Once a month or less | Never |
|-----------|-----------------|-----------------|---------------------|----------------------|-------|

**4. During recess, gym, or PE, how much water do you usually drink?**

|                |                       |                              |                               |            |                                              |
|----------------|-----------------------|------------------------------|-------------------------------|------------|----------------------------------------------|
| A whole bottle | About a half a bottle | A whole plastic or paper cup | A half a plastic or paper cup | A few sips | I don't drink water during recess, gym or PE |
|----------------|-----------------------|------------------------------|-------------------------------|------------|----------------------------------------------|

**5. Between classes at school, about how often do you usually drink water?**

|           |                 |                 |                     |                      |       |
|-----------|-----------------|-----------------|---------------------|----------------------|-------|
| Every day | 3-4 days a week | 1-2 days a week | A few times a month | Once a month or less | Never |
|-----------|-----------------|-----------------|---------------------|----------------------|-------|

**6. Between classes at school, about how much water do you usually drink?**

|                |                       |                              |                               |            |                                     |
|----------------|-----------------------|------------------------------|-------------------------------|------------|-------------------------------------|
| A whole bottle | About a half a bottle | A whole plastic or paper cup | A half a plastic or paper cup | A few sips | I don't drink water between classes |
|----------------|-----------------------|------------------------------|-------------------------------|------------|-------------------------------------|

**7. During lunch, how often do you usually drink a sugary drink? Sugary drinks include soda, lemonade or fruit punch, sports drinks (like Gatorade), energy drinks (like Monster or Red Bull), or sweetened iced tea or coffee (like a Frappuccino).**

|           |                 |                 |                     |                      |       |
|-----------|-----------------|-----------------|---------------------|----------------------|-------|
| Every day | 3-4 days a week | 1-2 days a week | A few times a month | Once a month or less | Never |
|-----------|-----------------|-----------------|---------------------|----------------------|-------|

**8. During lunch, how much of a sugary drink do you usually drink?**

|                       |                              |            |                                          |
|-----------------------|------------------------------|------------|------------------------------------------|
| A whole bottle or can | About a half a bottle or can | A few sips | I don't drink sugary drinks during lunch |
|-----------------------|------------------------------|------------|------------------------------------------|

**9. Between classes at school, about how often do you usually drink a sugary drink?**

|           |                 |                 |                     |                      |       |
|-----------|-----------------|-----------------|---------------------|----------------------|-------|
| Every day | 3-4 days a week | 1-2 days a week | A few times a month | Once a month or less | Never |
|-----------|-----------------|-----------------|---------------------|----------------------|-------|

**10. Between classes at school, about how much of a sugary drink do you usually drink?**

|                       |                              |            |                                             |
|-----------------------|------------------------------|------------|---------------------------------------------|
| A whole bottle or can | About a half a bottle or can | A few sips | I don't drink sugary drinks between classes |
|-----------------------|------------------------------|------------|---------------------------------------------|

**11. How easy is it to get a drink of water at your school when you're thirsty? Circle one:**

|           |               |               |           |
|-----------|---------------|---------------|-----------|
| Very easy | Somewhat easy | Somewhat hard | Very hard |
|-----------|---------------|---------------|-----------|

**12. How crowded is it near the water fountain or cooler you use most often at school? Circle one:**

|                                              |                                                     |                                                   |
|----------------------------------------------|-----------------------------------------------------|---------------------------------------------------|
| Very crowded – I always have to wait in line | A little crowded – I sometimes have to wait in line | Not at all crowded – I never have to wait in line |
|----------------------------------------------|-----------------------------------------------------|---------------------------------------------------|

**13. Think about the water fountain or cooler you use most often at school. How does the water from this fountain or cooler taste?**

|           |      |    |     |          |
|-----------|------|----|-----|----------|
| Very good | Good | OK | Bad | Very bad |
|-----------|------|----|-----|----------|

**14. Think about the water fountain or cooler you use most often at school again. How clean is it?**

|            |       |                |       |            |
|------------|-------|----------------|-------|------------|
| Very clean | Clean | Somewhat clean | Dirty | Very dirty |
|------------|-------|----------------|-------|------------|

**15. Do you think your friends like to drink water at school?**

|     |    |            |
|-----|----|------------|
| Yes | No | Don't know |
|-----|----|------------|

**16. Do you think your family wants you to drink water at school?**

|     |    |            |
|-----|----|------------|
| Yes | No | Don't know |
|-----|----|------------|

**17. Do you think your teachers want you to drink water at school?**

|     |    |            |
|-----|----|------------|
| Yes | No | Don't know |
|-----|----|------------|

**18. Think about yesterday. Did you have a headache at any point during the day?**

|     |    |            |
|-----|----|------------|
| Yes | No | Don't know |
|-----|----|------------|

**19. Think about yesterday. Did you find it hard to concentrate at any point during the day?**

|     |    |            |
|-----|----|------------|
| Yes | No | Don't know |
|-----|----|------------|

**20. Think about yesterday. Did you feel very thirsty at any point during the day?**

|     |    |            |
|-----|----|------------|
| Yes | No | Don't know |
|-----|----|------------|

**21. Think about yesterday. Did your stomach hurt at any point during the day?**

|     |    |            |
|-----|----|------------|
| Yes | No | Don't know |
|-----|----|------------|
